# Supplementary material for: Additive effects of gastric volumes and macronutrient composition on the sensation of postprandial fullness in humans
Source: PubMed Central journal article supplement (PMC4351404; doi:10.1038/ejcn.2014.194), 2014-09-17
Supplement: ejcn2014194x1.pdf [file ejcn2014194x1.pdf]

**Supplementary Table 1. Macronutrient composition of the two study meals**

|                                      | Carbohydrate |        |         |              |          |      |       |       |
|--------------------------------------|--------------|--------|---------|--------------|----------|------|-------|-------|
|                                      | Amount       | Energy | Protein | Total        | of which |      |       |       |
|                                      | (g)          | (kJ)   | (g)     | carbohydrate | sugars   | Fat  | Fiber | Salt  |
|                                      | (g)          | (kJ)   | (g)     | (g)          | (g)      | (g)  | (g)   | (g)   |
| <b><i>High carbohydrate meal</i></b> |              |        |         |              |          |      |       |       |
| Rice pudding                         | 220          | 887    | 6.8     | 37.2         | 22.4     | 3.7  | 0.4   | 0.1   |
| Raspberry jam                        | 34           | 353    | 0.2     | 20.5         | 18.7     | 0.03 | 1.0   | 0.03  |
| Orange juice                         | 100          | 179    | 0.5     | 9.1          | 9.1      | 0.1  | 0.1   | trace |
| Glucose polymer                      | 50           | 808    | 0       | 47.5         | 4.3      | 0    | 0     | trace |
| Total for high carbohydrate meal     | 404          | 2226   | 7.5     | 114.3        | 54.6     | 3.9  | 1.6   | 0.1   |
| <b><i>High fat meal</i></b>          |              |        |         |              |          |      |       |       |
| Rice pudding                         | 220          | 887    | 6.8     | 37.2         | 22.4     | 3.7  | 0.4   | 0.1   |
| Raspberry jam                        | 34           | 353    | 0.2     | 20.5         | 18.7     | 0.03 | 1.0   | 0.03  |
| Orange juice                         | 100          | 179    | 0.5     | 9.1          | 9.1      | 0.1  | 0.1   | trace |
| Double cream                         | 22           | 403    | 0.4     | 0.6          | 0.6      | 10.5 | 0     | trace |
| Total for high fat meal              | 376          | 1822   | 7.9     | 67.4         | 50.8     | 14.3 | 1.6   | 0.1   |

**Supplementary Table 2.** Individual linear regression of absolute values of fullness and gastric volumes for each subject and meal

| <i>Subject</i> | <i>Carbohydrate meal</i> |                |        | <i>Fat meal</i> |                |        |
|----------------|--------------------------|----------------|--------|-----------------|----------------|--------|
|                | Slope                    | R <sup>2</sup> | p      | Slope           | R <sup>2</sup> | p      |
| 1              | 0.072                    | 0.6944         | 0.0102 | 0.173           | 0.9457         | 0.0001 |
| 2              | 0.063                    | 0.6358         | 0.0178 | 0.096           | 0.9334         | 0.0001 |
| 3              | 0.104                    | 0.7886         | 0.0032 | 0.059           | 0.6504         | 0.0156 |
| 4              | 0.085                    | 0.8568         | 0.0010 | 0.073           | 0.8778         | 0.0006 |
| 5              | 0.089                    | 0.5336         | 0.0396 | 0.139           | 0.9078         | 0.0003 |
| 6              | 0.079                    | 0.6218         | 0.0200 | 0.048           | 0.7759         | 0.0039 |
| 7              | 0.137                    | 0.7056         | 0.0090 | 0.179           | 0.9552         | 0.0001 |
| 8              | 0.062                    | 0.7466         | 0.0057 | 0.130           | 0.9412         | 0.0001 |
| 9              | 0.170                    | 0.9332         | 0.0001 | 0.126           | 0.7578         | 0.0049 |
| 10             | 0.004                    | 0.0018         | 0.9209 | 0.090           | 0.9367         | 0.0001 |
| 11             | 0.198                    | 0.9048         | 0.0003 | 0.184           | 0.7183         | 0.0079 |
| 12             | 0.066                    | 0.8124         | 0.0022 | 0.110           | 0.9797         | 0.0001 |
| 13             | 0.147                    | 0.8172         | 0.0021 | 0.137           | 0.9259         | 0.0001 |

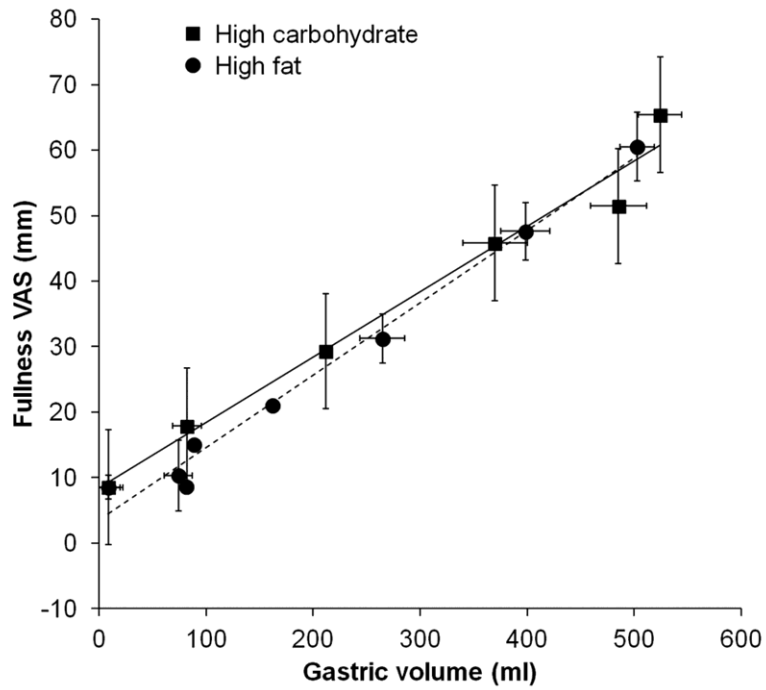

**Supplementary Figure 1:**

Absolute values of fullness visual analogue scale (VAS) scores plotted against the absolute values of total gastric volumes at corresponding scan time points. The solid and dotted lines are respectively the linear regression lines of best fit for the high carbohydrate meal ( $R^2=0.98$ ,  $P<0.0001$ ) and the high fat meal ( $R^2=0.98$ ,  $P<0.0001$ ). Values are mean  $\pm$  s.e.m.,  $n=13$ .
